# Supplementary material for: Polysaccharides fromNostoc communeVaucher activate macrophagesviaNF-κB and AKT/JNK1/2 pathways to suppress colorectal cancer growthin vivo
Source: Royal Society of Chemistry journal article supplement (doi:10.1039/c9fo00595a), 2019-01-01
Supplement: c9fo00595a1.pdf [file c9fo00595a1.pdf]

Table S1 Primers for qRT-PCR.

| Target gene                    | Primer set     | Oligonucleotide sequence     |
|--------------------------------|----------------|------------------------------|
| <i>TNF-<math>\alpha</math></i> | Forward primer | 5'-AGCTGGTGGTGCCATCAGAGG-3'  |
|                                | Reverse primer | 5'-TGGTAGGAGACGGCGATGCG-3'   |
| <i>IL-1<math>\beta</math></i>  | Forward primer | 5'-GCCAGTGAAATGATGGCTTATT-3' |
|                                | Reverse primer | 5'-AGGAGCACTTCATCTGTTTAGG-3' |
| <i>IL-6</i>                    | Forward primer | 5'-CACTGGTCTTTTGGAGTTTGAG-3' |
|                                | Reverse primer | 5'-GGACTTTTGTACTCATCTGCAC-3' |
| <i>IL-12<math>\beta</math></i> | Forward primer | 5'-TAAGATGCGAGGCCAAGAATTA-3' |
|                                | Reverse primer | 5'-TACTCATACTCCTTGTTGTCCC-3' |
| <i>GAPDH</i>                   | Forward primer | 5'-CAGGAGGCATTGCTGATGAT-3'   |
|                                | Reverse primer | 5'-GAAGGCTGGGGCTCATTT-3'     |
